# Supplementary material for: Global spectral and local molecular connects for optical coherence tomography features to classify oral lesions towards unravelling quantitative imaging biomarkers
Source: Royal Society of Chemistry journal article supplement (doi:10.1039/c5ra24117k), 2016-01-01
Supplement: c5ra24117k1.pdf [file c5ra24117k1.pdf]

**Electronic Supplementary Material:**

**Supplementary Table 1:** Clinical Diagnostic Features of oral lesions to be included in the study

| Disease | Diagnostic Features Used for Biopsy Recommendation                                                                                                                                                                                                                                                                                                                                                                                                                                 | Reference |
|---------|------------------------------------------------------------------------------------------------------------------------------------------------------------------------------------------------------------------------------------------------------------------------------------------------------------------------------------------------------------------------------------------------------------------------------------------------------------------------------------|-----------|
| OLK     | <ul style="list-style-type: none"> <li>• white single localized, multiple, or diffuse widespread lesions with                             <ul style="list-style-type: none"> <li>○ surface nodularity</li> <li>○ erythema</li> <li>○ ulceration</li> <li>○ increased firmness and induration</li> <li>○ • unexplained hemorrhage</li> </ul> </li> </ul>                                                                                                                            | 1, 2      |
| OSF     | <ul style="list-style-type: none"> <li>• White Patch</li> <li>• Trismus</li> <li>• Soreness of mucosa</li> <li>• Increased sensitivity to chilies</li> <li>• Nodule</li> </ul>                                                                                                                                                                                                                                                                                                     | 3         |
| OSCC    | Oral: <ul style="list-style-type: none"> <li>• Any solitary lump, ulcer, white or red lesion retaining for more than three weeks or non-healing socket</li> <li>• Numbness</li> <li>• Unexplained loose tooth'</li> </ul> Extraoral: <ul style="list-style-type: none"> <li>• Cervical lymphadenopathy may be detectable.</li> <li>• Synchronous and metachronous second primary tumors may be found in the upper aerodigestive tract (pharynx, larynx, and esophagus).</li> </ul> | 1, 2      |

**Supplementary Table 2:** Details of the intensity features used to differentiate OCT images<sup>4,5</sup>

| Feature            | Mathematical Formula                                           | Description                                                                                                                                                                                                                                                                                                                                                                                      |
|--------------------|----------------------------------------------------------------|--------------------------------------------------------------------------------------------------------------------------------------------------------------------------------------------------------------------------------------------------------------------------------------------------------------------------------------------------------------------------------------------------|
| $Mean_{Gray}(\mu)$ | $\frac{\sum_{k=1}^N I_k}{N}$                                   | N is the number of pixels and $I_k$ is the $k^{th}$ intensity level of the image.                                                                                                                                                                                                                                                                                                                |
| $Median_{Gray}(m)$ | $L + \frac{\left\lfloor \frac{N+1}{2} \right\rfloor - F}{f_m}$ | Computes the middle value of the pixel intensities. This formula computes the median for ungrouped data. $L$ : lower boundary of the median class, $F$ : cumulative frequency of the classes before the median class, $f_m$ : frequency of the median class, $C$ : class size. For ungrouped sorted data, median is the value of the $\left\lfloor \frac{N+1}{2} \right\rfloor^{th}$ data point. |

|                                     |                                                                            |                                                                                                                                                                               |
|-------------------------------------|----------------------------------------------------------------------------|-------------------------------------------------------------------------------------------------------------------------------------------------------------------------------|
| $Variance_{Gray}(\sigma^2)$         | $\frac{\sum_{k=1}^N (I_k - \mu)^2}{N}$                                     | The average of the squared differences of the intensities from the mean intensity.                                                                                            |
| $StandardDeviation_{Gray}(\sigma)$  | $\sqrt{\sigma^2}$                                                          | A measure of how spread out the intensities are.                                                                                                                              |
| $CoefficientofVariance_{Gray}(C_v)$ | $\frac{\sigma}{\mu}$                                                       | The ratio of the standard deviation to the mean.                                                                                                                              |
| $Entropy_{Gray}$                    | $-\sum_{j=0}^{L-1} p_j \log_2 p_j$                                         | A measure to describe the busyness of the image. $L$ : number of pixel intensity levels in the image, $p_j$ : probability of occurrence of a pixel with intensity value $j$ . |
| $Skewness_{Gray}$                   | $\frac{1}{\sigma^3} \frac{\sum_{k=1}^N (I_k - \mu)^3}{N}$                  | A measure of symmetry, or more precisely, the lack of symmetry.                                                                                                               |
| $Kurtosis_{Gray}$                   | $\left(\frac{1}{\sigma^4} \frac{\sum_{k=1}^N (I_k - \mu)^4}{N}\right) - 3$ | A measure of any peakedness of the distribution of the data                                                                                                                   |

**Supplementary Table 3:** Details of the textural features used to differentiate OCT images<sup>4, 6</sup>

| Feature                                | Mathematical Formula                                                                                       | Description                                                                                                                                                                  |
|----------------------------------------|------------------------------------------------------------------------------------------------------------|------------------------------------------------------------------------------------------------------------------------------------------------------------------------------|
| Co-occurrence Probability ( $C_{ij}$ ) | $\frac{P_{ij}}{\sum_{i=0}^{L-1} \sum_{j=0}^{L-1} P_{ij}}$                                                  | $P_{ij}$ is the number of co-occurrences of gray levels $i$ and $j$ .                                                                                                        |
| $Inertia_{GLCM}$                       | $\sum_{i=0}^{L-1} \sum_{j=0}^{L-1} (i-j)^2 C_{ij}$                                                         | A measure of the distribution of gray-scales in the image. A higher value indicates presence of higher magnitude elements away from the diagonal ( $i \neq j$ ) in the GLCM. |
| $Correlation_{GLCM}$                   | $\sum_{i=0}^{L-1} \sum_{j=0}^{L-1} C_{ij} \left( \frac{(i - \mu_i)(j - \mu_j)}{\sigma_i \sigma_j} \right)$ | A measure of gray level linear dependence between the pixels at the specified positions relative to each other.                                                              |
| $Energy_{GLCM}$                        | $\sum_{i=0}^{L-1} \sum_{j=0}^{L-1} C_{ij}^2$                                                               | High value of energy indicates orderliness in the image window.                                                                                                              |
| $Entropy_{GLCM}$                       | $\sum_{i=0}^{L-1} \sum_{j=0}^{L-1} C_{ij} \log_2 (C_{ij} + \varepsilon)$                                   | Higher entropy value indicates that an image is more homogenous. $\varepsilon$ is an arbitrarily small constant equal to the floating point                                  |

|                                            |                                                                     |                                                                                                                                                                                                         |
|--------------------------------------------|---------------------------------------------------------------------|---------------------------------------------------------------------------------------------------------------------------------------------------------------------------------------------------------|
|                                            |                                                                     | accuracy= $2^{-52}$                                                                                                                                                                                     |
| <i>Homogeneity</i> <sub>GLCM</sub>         | $\sum_{i=0}^{L-1} \sum_{j=0}^{L-1} \frac{C_{ij}}{1+ i-j }$          | A high homogeneity measure indicates the presence of only a few gray levels in the image.                                                                                                               |
| Cluster Shade                              | $\sum_{i=0}^{L-1} \sum_{j=0}^{L-1} C_{ij} (i+j-\mu_i-\mu_j)^3$      | A measure of skewness or asymmetry of the GLCM. High value indicates lack of symmetry. $\mu_i = \sum_{i=0}^{L-1} i \sum_{j=0}^{L-1} C_{ij}$ ;<br>$\mu_j = \sum_{j=0}^{L-1} j \sum_{i=0}^{L-1} C_{ij}$ . |
| Cluster Prominence                         | $\sum_{i=0}^{L-1} \sum_{j=0}^{L-1} C_{ij} (i+j-\mu_i-\mu_j)^4$      | A similar measure of skewness or asymmetry of the GLCM. A low value indicates a peak in the GLCM around the mean values thus implying little variation in the gray scales in the original image.        |
| Information Measures of Correlation        | $\sqrt{1-e^{-2(h_2-h_1)}}$                                          | $h_1 = Entropy_{GLCM} ;$<br>$h_2 = -\sum_{i=0}^{L-1} \sum_{j=0}^{L-1} C_i C_j \log_2(C_i C_j + \varepsilon) ;$<br>$C_i = \sum_{i=0}^{L-1} C_{ij}, C_j = \sum_{j=0}^{L-1} C_{ij} .$                      |
| Maximum Probability                        | $\max(C_{ij})$                                                      | Maximum value of the co-occurrence matrix elements.                                                                                                                                                     |
| Sum of Entropy( $S_E$ )                    | $-\sum_{k=2}^{2L-2} p_{i+j}(k) \log_2(p_{i+j}(k) + \varepsilon)$    | $p_{i+j}(k) = \sum_{i=0}^{L-1} \sum_{j=0}^{L-1} C_{ij} ;$<br>$i+j=k; k=0,1,2,\dots,2(L-1).$                                                                                                             |
| Sum of Variance( $S_{\sigma^2}$ )          | $-\sum_{k=2}^{2L-2} (k-S_E)^2 p_{i+j}(k)$                           | A high value indicates equal concentration of the frequency of occurrence in the highest and lowest cells of the GLCM.                                                                                  |
| Difference Entropy( $D_E$ )                | $-\sum_{k=0}^{L-1} p_{ i-j }(k) \log_2(p_{ i-j }(k) + \varepsilon)$ | $p_{ i-j }(k) = \sum_{i=0}^{L-1} \sum_{j=0}^{L-1} C_{ij} ;$<br>$ i-j =k; k=0,1,2,\dots,L-1.$                                                                                                            |
| <i>Mean</i> <sub>LBP</sub> ( $\mu_{LBP}$ ) | $\frac{\sum_{k=1}^M ILBP}{M}$                                       | Mean value of the intensity levels of the LBP (Local Binary Pattern) image. $ILBP_k$ is the $k^{th}$ level intensity value of the LBP image. $M$ is the number of intensity levels in the LBP image.    |

|                           |                                                        |                                                                                                     |
|---------------------------|--------------------------------------------------------|-----------------------------------------------------------------------------------------------------|
| $StandardDeviation_{LBP}$ | $\sqrt{\frac{\sum_{k=1}^M (ILBP_k - \mu_{LBP})^2}{M}}$ | The average of the squared differences of the intensities from the mean intensity in the LBP image. |
|---------------------------|--------------------------------------------------------|-----------------------------------------------------------------------------------------------------|

### References:

1. B. W. Neville and T. A. Day, *CA: a cancer journal for clinicians*, 2002, **52**, 195-215.
2. C. Scully, O. P. De Almeida, J. Bagan, P. D. Dios and A. M. Taylor, *Oral medicine and pathology at a glance*, John Wiley & Sons, 2013.
3. P. N. Wahi, V. L. Kapur, U. K. Luthra and M. C. Srivastava, *Bulletin of the World Health Organization*, 1966, **35**, 789-792.
4. R. M. Haralick, *Proceedings of the IEEE*, 1979, **67**, 786-804.
5. B. Park and Y. Chen, *Journal of agricultural engineering research*, 2001, **78**, 127-139.
6. G. J. Ughi, T. Adriaenssens, P. Sinnaeve, W. Desmet and J. D'Hooge, *Biomedical optics express*, 2013, **4**, 1014-1030.
